# Supplementary material for: How active are our children? Findings from the Millennium Cohort Study
Source: HighWire-hosted journal article supplement (doi:10.1136/bmjopen-2013-002893), 2013-07-01
Supplement: bmjopen-2013-002893supp_table.pdf [file bmjopen-2013-002893supp_table.pdf]

**eTable1** Description of sample; percentages, unless otherwise stated

|                                               | All singleton children in MCS4<br>N (weighted %) |                  |                  | Singleton children with reliable<br>accelerometer data<br>(≥2 days for at least ≥10 hours<br>per day)<br>N (weighted %) |                  |                 |
|-----------------------------------------------|--------------------------------------------------|------------------|------------------|-------------------------------------------------------------------------------------------------------------------------|------------------|-----------------|
|                                               | Male<br>n=6950                                   | Female<br>n=6731 | Total<br>n=13681 | Male<br>n=3176                                                                                                          | Female<br>n=3321 | Total<br>n=6497 |
| <i>Child's ethnic group</i>                   |                                                  |                  |                  |                                                                                                                         |                  |                 |
| White                                         | 5828<br>(85.6)                                   | 5610<br>(85.3)   | 11438<br>(85.4)  | 2795<br>(85.0)                                                                                                          | 2915<br>(85.3)   | 5710<br>(85.2)  |
| Mixed                                         | 178<br>(3.1)                                     | 194<br>(3.3)     | 372<br>(3.3)     | 85<br>(3.5)                                                                                                             | 83<br>(3.0)      | 168<br>(3.2)    |
| Indian                                        | 179<br>(2.1)                                     | 162<br>(1.8)     | 341<br>(1.9)     | 61<br>(1.8)                                                                                                             | 78<br>(2.2)      | 139<br>(2.0)    |
| Pakistani                                     | 308<br>(3.4)                                     | 321<br>(3.7)     | 629<br>(3.5)     | 93<br>(4.2)                                                                                                             | 84<br>(3.4)      | 177<br>(3.8)    |
| Bangladeshi                                   | 113<br>(1.1)                                     | 141<br>(1.3)     | 254<br>(1.2)     | 30<br>(1.2)                                                                                                             | 40<br>(1.4)      | 70<br>(1.3)     |
| Black                                         | 221<br>(3.2)                                     | 193<br>(2.8)     | 414<br>(3.0)     | 71<br>(2.9)                                                                                                             | 71<br>(2.8)      | 142<br>(2.8)    |
| Other ethnic group                            | 121<br>(1.6)                                     | 106<br>(1.7)     | 227<br>(1.6)     | 41<br>(1.4)                                                                                                             | 49<br>(1.9)      | 90<br>(1.6)     |
| <i>Maternal socioeconomic circumstances</i>   |                                                  |                  |                  |                                                                                                                         |                  |                 |
| Managerial and<br>professional<br>occupations | 1942<br>(28.1)                                   | 1906<br>(29.6)   | 3848<br>(28.8)   | 1098<br>(28.2)                                                                                                          | 1092<br>(27.8)   | 2190<br>(28.0)  |

|                                             |                |                |                 |                |                |                |
|---------------------------------------------|----------------|----------------|-----------------|----------------|----------------|----------------|
| Intermediate occupations                    | 1229<br>(18.7) | 1115<br>(17.9) | 2344<br>(18.3)  | 592<br>(18.6)  | 610<br>(17.9)  | 1202<br>(18.3) |
| Small employers and own account workers     | 422<br>(7.0)   | 403<br>(6.5)   | 825<br>(6.7)    | 217<br>(7.0)   | 225<br>(6.7)   | 442<br>(6.8)   |
| Lower supervisory and technical occupations | 293<br>(4.5)   | 296<br>(4.6)   | 589<br>(4.6)    | 138<br>(5.0)   | 150<br>(5.5)   | 288<br>(5.2)   |
| Semi-routine and routine occupations        | 2263<br>(35.8) | 2197<br>(34.8) | 4460<br>(35.3)  | 893<br>(34.7)  | 972<br>(35.2)  | 1865<br>(34.9) |
| Never worked and long-term unemployed       | 426<br>(6.0)   | 466<br>(6.6)   | 892<br>(6.3)    | 118<br>(6.5)   | 150<br>(7.0)   | 268<br>(6.7)   |
| <i>Lone parenthood</i>                      |                |                |                 |                |                |                |
| No                                          | 5530<br>(77.9) | 5375<br>(78.9) | 10905<br>(78.4) | 2718<br>(78.3) | 2818<br>(77.7) | 5536<br>(78.0) |
| Yes                                         | 1420<br>(22.1) | 1356<br>(21.1) | 2776<br>(21.6)  | 458<br>(21.7)  | 503<br>(22.3)  | 961<br>(22.0)  |
| <i>No. children in the household</i>        |                |                |                 |                |                |                |
| Only child                                  | 903<br>(13.2)  | 868<br>(13.4)  | 1771<br>(13.3)  | 340<br>(11.7)  | 386<br>(13.0)  | 726<br>(12.4)  |
| At least one other child                    | 6047<br>(86.8) | 5863<br>(86.6) | 11910<br>(86.7) | 2836<br>(88.3) | 2935<br>(87.0) | 5771<br>(87.6) |
| <i>Country of residence</i>                 |                |                |                 |                |                |                |
| England                                     | 4451<br>(63.9) | 4335<br>(64.6) | 8786<br>(64.2)  | 2064<br>(64.7) | 2140<br>(65.2) | 4204<br>(65.0) |

|                  |                |               |                |               |               |               |
|------------------|----------------|---------------|----------------|---------------|---------------|---------------|
| Wales            | 1015<br>(14.8) | 930<br>(13.6) | 1945<br>(14.2) | 450<br>(14.8) | 448<br>(13.3) | 898<br>(14.0) |
| Scotland         | 809<br>(11.3)  | 790<br>(12.0) | 1599<br>(11.6) | 363<br>(11.1) | 398<br>(11.9) | 761<br>(11.5) |
| Northern Ireland | 675<br>(10.0)  | 676<br>(9.8)  | 1351<br>(9.9)  | 299<br>(9.4)  | 335<br>(9.6)  | 634<br>(9.5)  |

Missing data: Child's ethnic group, 6 for all children in MCS4 and 1 for children with activity data; Maternal socioeconomic class, 723 for all children in MCS4 and 259 for children with activity data.
